# Supplementary material
Source: PubMed Central journal article supplement (PMC11162680)
Supplement: ajcr0014-2037-f8.pdf [file ajcr0014-2037-f8.pdf]

## POLR2J promotes glioblastoma malignancy

**Supplementary Table 1.** Primer sequences used for RT-PCR assay

| Gene list | Forward primer          | Reverse primer      |
|-----------|-------------------------|---------------------|
| POLR2J    | GGGCGAGAAGAAGATCACCATTA | TTTATGGCCACCCGAAAGC |
| GAPDH     | GAGTCAACGGATTGGTCGT     | TTGATTTGGAGGGATCTCG |
